# Supplementary material
Source: publisher site journal article supplement (https://en-cdn.bio-protocol.org/attached/file/20180610/2883%20Supplemental%20Figure%20S1.docx)
Supplement: Supplementary file 1 [file 2883%20Supplemental%20Figure%20S1.docx]

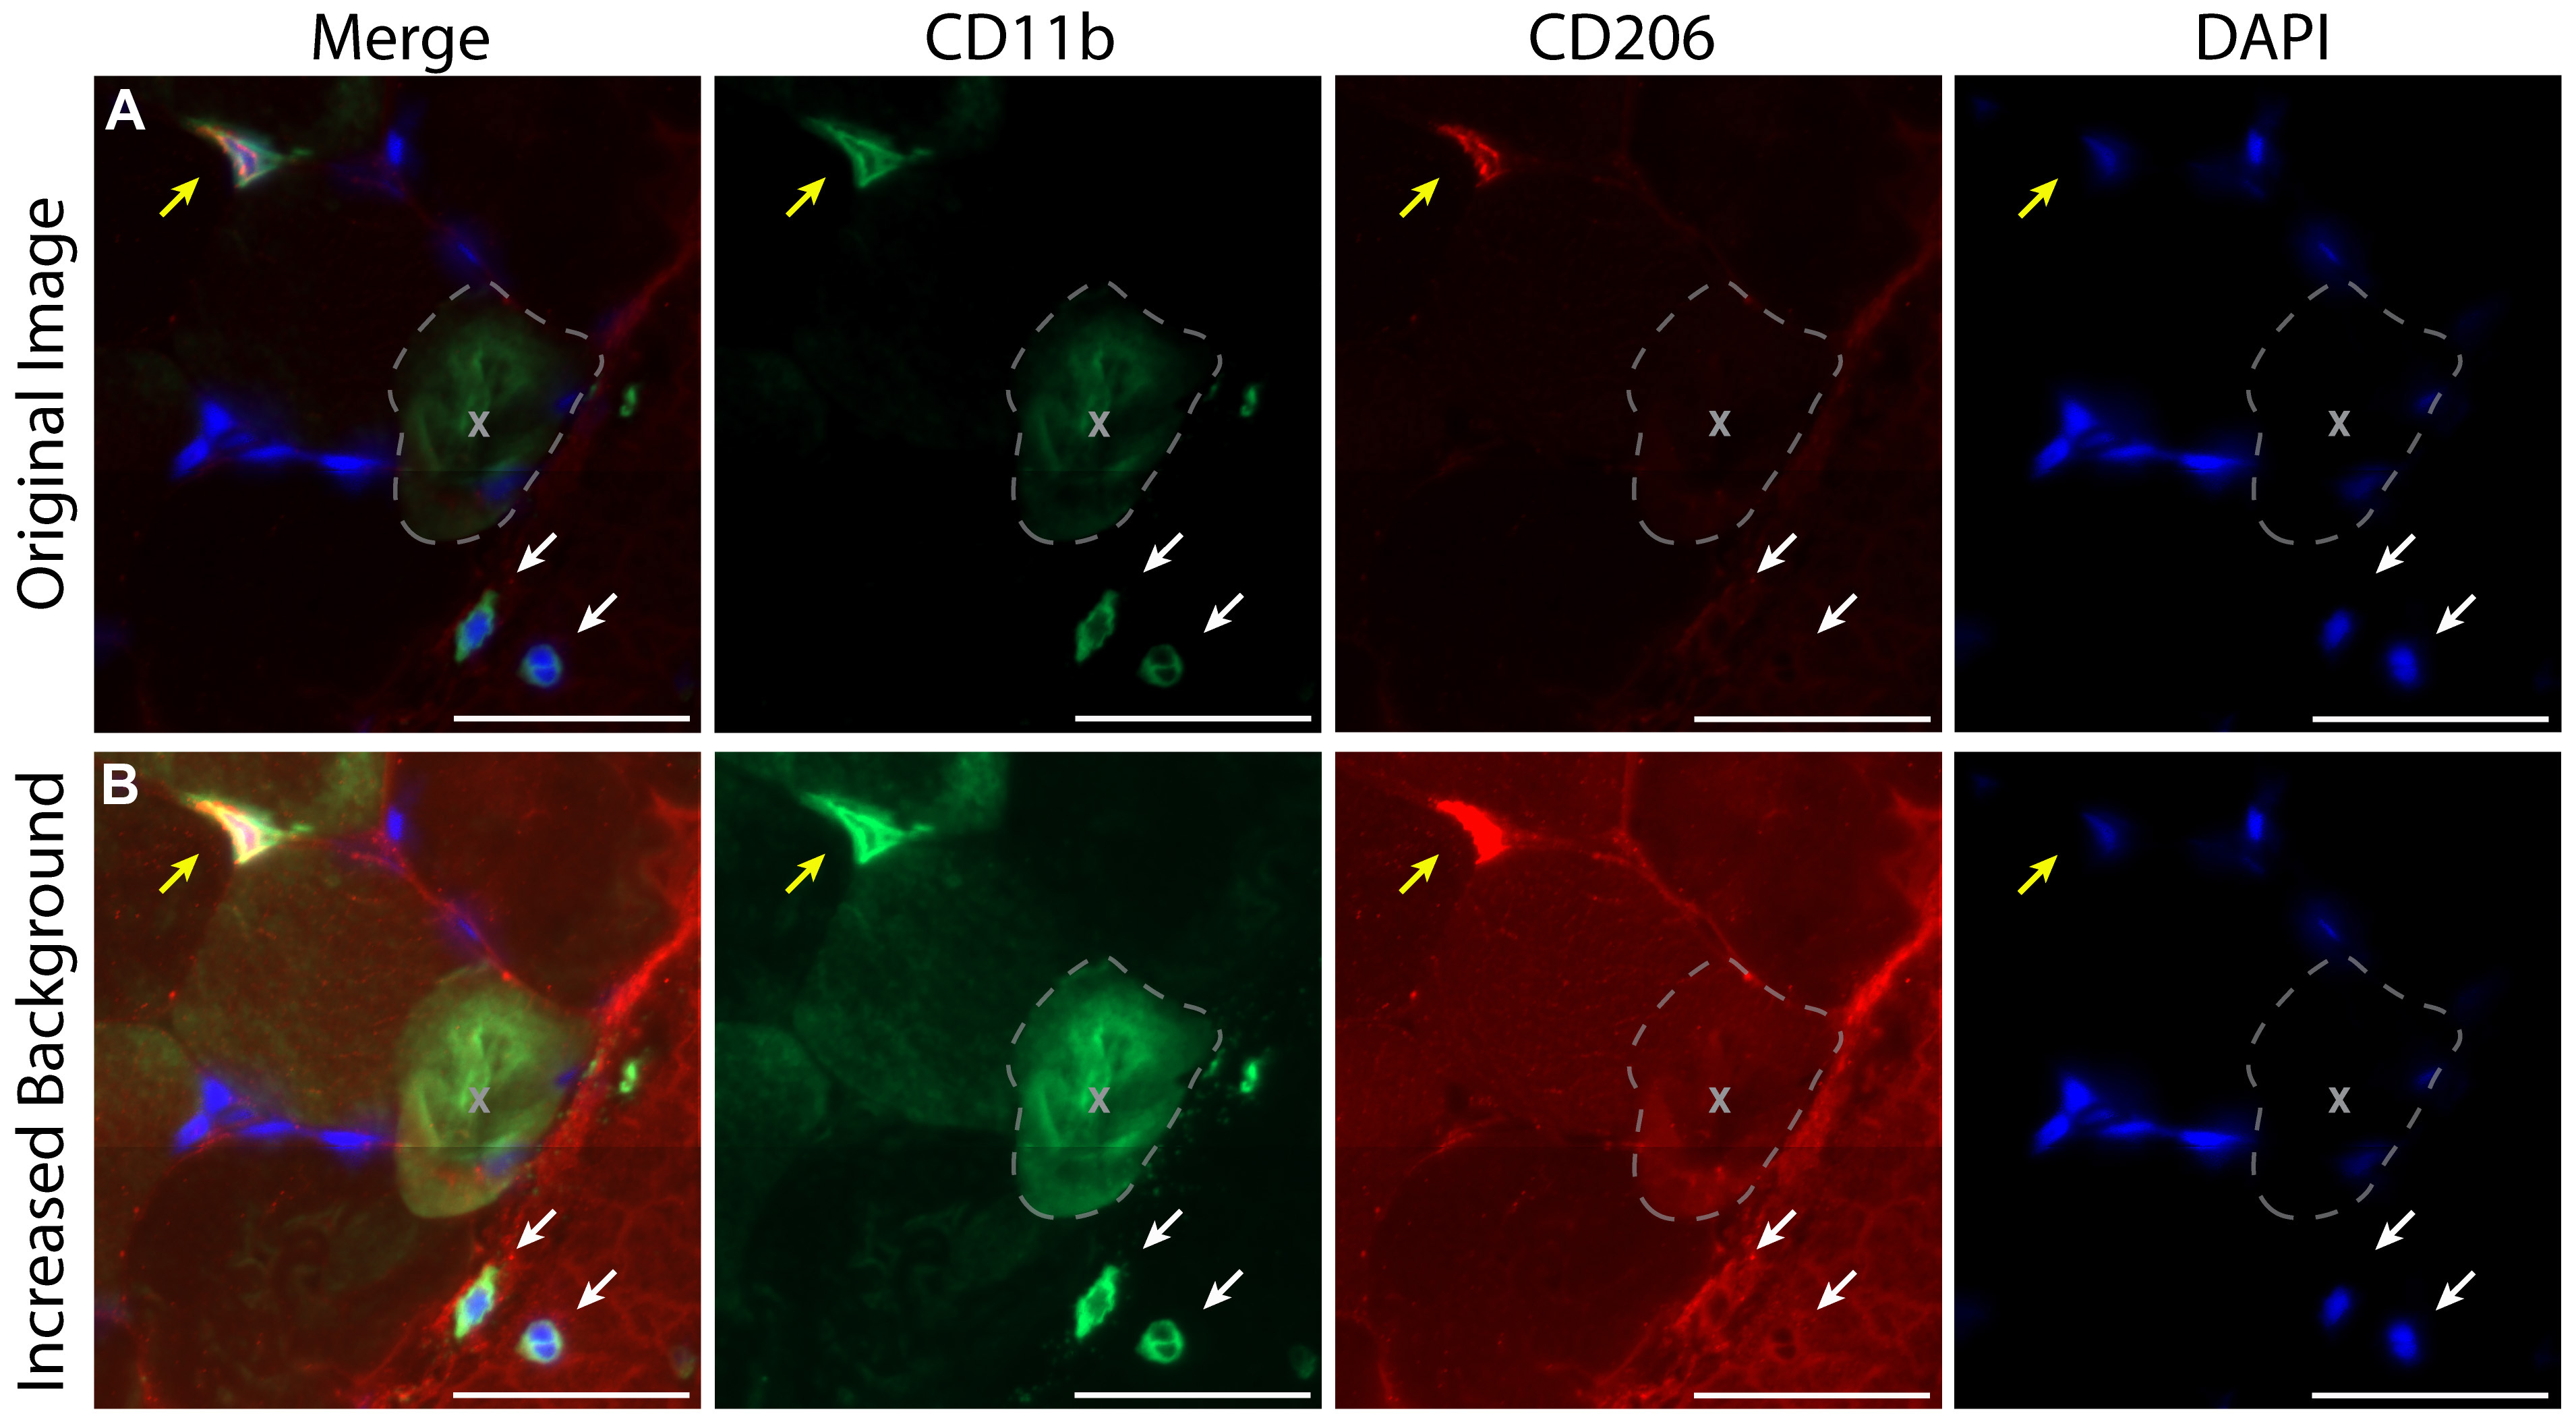


**Figure S1. Images showing a bubble underneath a skeletal muscle section.** A. The original image prior to display adjust. The grey outline is demarcating the borders of the bubble. Yellow arrow points to a CD11b+/CD206+ macrophage and white arrows point to CD11b+/CD206- monocytes located in a blood patch (Figure 5, panel B). B. The same image with the display adjusted to make background staining more visible, clearly showing the bubble present underneath the tissue section.
